# Supplementary material for: Geospatial analysis of the association of cardiometabolic diseases and incident Lewy body dementia in the Medicare population
Source: Research Square preprint supplement (doi:10.21203/rs.3.rs-8491743/v1), 2026-01-07
Supplement: Supplementary file 1 [file 13bca2c01c50fc2727588048.docx]

**eTable 2**. Definition of Lewy body dementia.

| **Description** | | **ICD-10 Codes** | **Timeframe** | **Diagnosis date** |
| --- | --- | --- | --- | --- |
| Lewy body dementia (LBD) | G31.83 | | Incident LBD code (G31.83) in 2016 or 2017 | Date when incident LBD code (G31.83) identified |
| Dementia with Parkinson’s disease (PD) | F01.50, F01.51, F02.80, F02.81, F03.90, F03.91, F04, F05, F06.1, F06.8, G13.8, G30.0, G30.1, G30.8, G30.9, G31.01, G31.09, G31.1, G31.2, G94, R41.81, R54 | | Incident PD code (G20) in 2016 or 2017 + any dementia code 2 years before or within 12 months of incident PD dates. | Date when incident PD code (G20) identified |
